# Supplementary material for: Ratiometric fluorescent semiconducting polymer dots for temperature sensing
Source: Royal Society of Chemistry journal article supplement (doi:10.1039/d2an01717b), 2023-01-01
Supplement: d2an01717b1.pdf [file d2an01717b1.pdf]

# Supporting information

## Ratiometric fluorescent semiconducting polymer dots for sensing of temperature

Shuyi He,<sup>a</sup> Steven Wu<sup>a\*</sup>

a. Department of Chemistry, University of South Dakota, Vermillion, South Dakota, 57069, USA.

\* Corresponding author.

E-mail address: [Steven.Wu01@usd.edu](mailto:Steven.Wu01@usd.edu)

### 1. Optimization of the concentration of Eu in Pdots.

In order to obtain the best performance of the sensing system, we first tried different concentrations of Eu in Pdots. As shown in Supporting Information Figure S1, increasing the content of Eu not only increases the particle size of nanoparticles, but also increases the fluorescence intensity. Oversized nanoparticles tend to aggregate in solution, so we finally chose Eu15 for subsequent experiments.

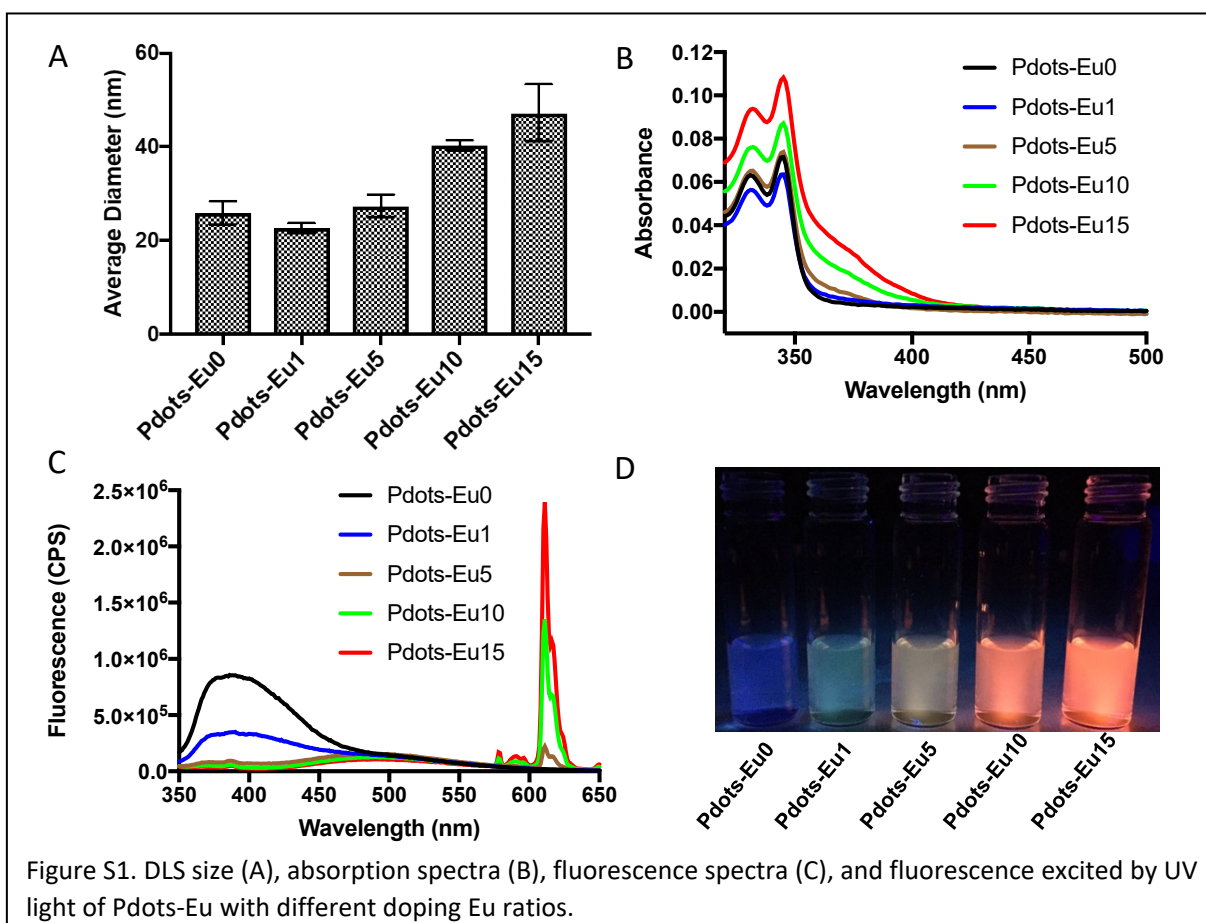

## 2. The fluorescence reversibility test upon cycling the temperature between 25 and 50 °C

As shown in Figure S2, even after five cycles of temperature change between 25 and 50 °C, the normalized ratio ( $I_{611}/I_{368}$ ) of Pdots-Eu only showed about 0.01 difference, implying the good reversibility.

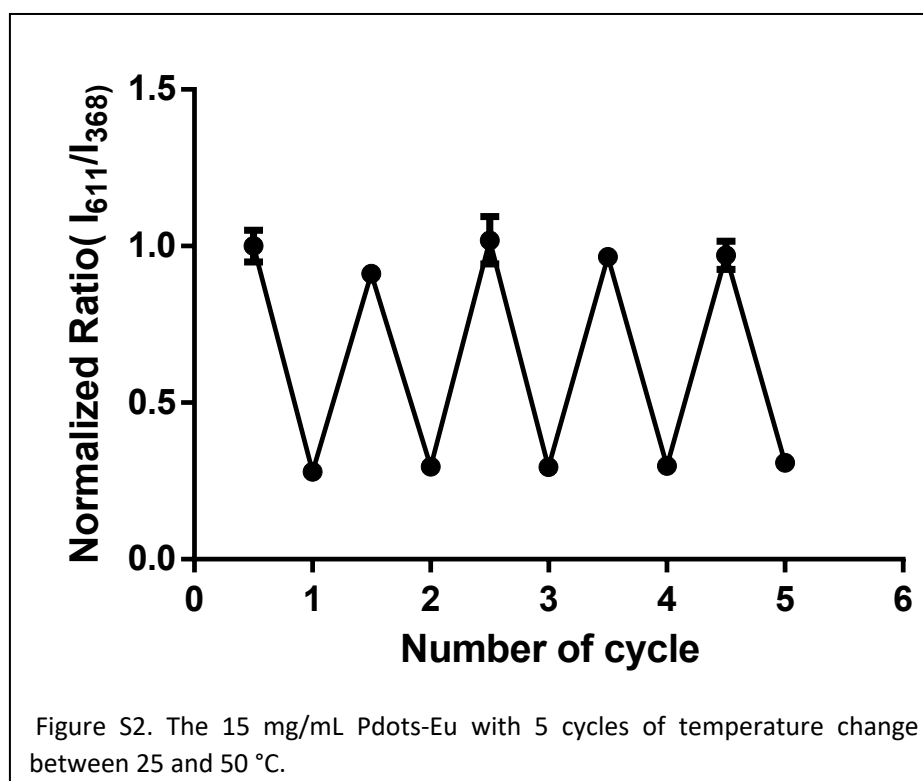

## 3. Table S1. Temperature range and resolution of Pdots-Eu and other recently reported nanothermometers.

| Fluorescent probe       | Linear ranges / °C | Resolution / %·°C <sup>-1</sup> | Ref.      |
|-------------------------|--------------------|---------------------------------|-----------|
| Metal-organic framework | 20–80              | 1.28                            | 1         |
| Organic dyes            | 25–43              | 2.65                            | 2         |
| Carbon NPs              | 25–80              | 0.84                            | 3         |
| Au/Ag NPs               | 20–65              | 1.34                            | 4         |
| AuNPs                   | 20–55              | 1.25                            | 5         |
| Pdots-Eu                | 25-50              | 2.99                            | This work |

1. Y. Cui, R. Song, J. Yu, M. Liu, Z. Wang, C. Wu, Y. Yang, Z. Wang, B. Chen and G. Qian, 2015, **27**, 1420-1425.
2. S. Arai, M. Suzuki, S. J. Park, J. S. Yoo, L. Wang, N. Y. Kang, H. H. Ha and Y. T. Chang, *Chemical communications (Cambridge, England)*, 2015, **51**, 8044-8047.
3. Y. Yang, W. Kong, H. Li, J. Liu, M. Yang, H. Huang, Y. Liu, Z. Wang, Z. Wang, T.-K. Sham, J. Zhong, C. Wang, Z. Liu, S.-T. Lee and Z. Kang, *ACS Applied Materials & Interfaces*, 2015, **7**, 27324-27330.
4. H. Huang, H. Li, J.-J. Feng and A.-J. Wang, *Sensors and Actuators B: Chemical*, 2016, **223**, 550-556.
5. H. Huang, H. Li, J.-J. Feng and A.-J. Wang, *Microchimica Acta*, 2017, **184**, 1215-1221.
